# Supplementary material
Source: Springer Nature journal article supplement (https://www.springermedizin.de/resource/supplementary/12916_2014_952_MOESM4_ESM.pdf/9598886)
Supplement: MOESM4 [file 9598886]

**Men (n=10,235)**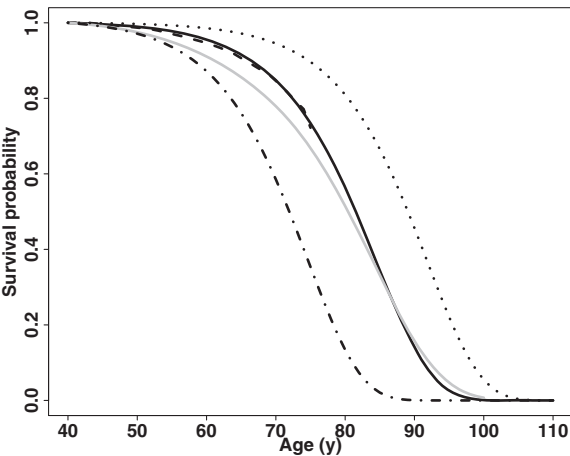**Women (n=12,234)**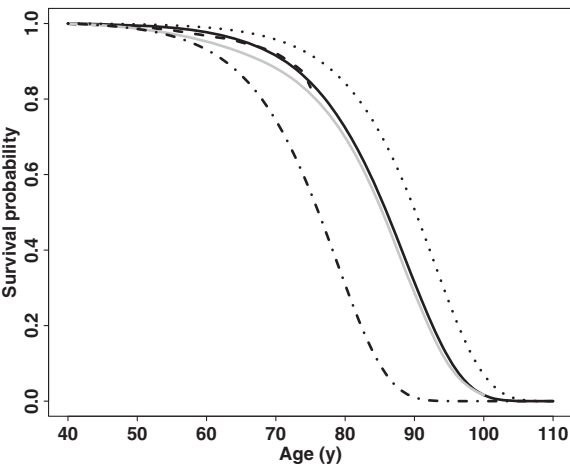

— Gompertz PH model

- - Observed data

— German life table

... Heathy combination

- · - · Unhealthy combination
